# Supplementary material for: Migration and political polarization in the U.S.: An analysis of the county-level migration network
Source: PubMed Central journal article supplement (PMC6874318; doi:10.1371/journal.pone.0225405), 2019-11-22
Supplement: pone.0225405.s001.pdf [file pone.0225405.s001.pdf]

# Supplementary Information: Migration and Political Polarization in the U.S.: An Analysis of the County-level Migration Network

## Data

We used counties of population 20,000 or more, as recorded in the 2010 Decennial Census. Since distance is an important factor influencing migration behavior, we removed all the migration flows to and from counties in Alaska and Hawaii. We also used the presidential voting data, employment data and census data that are closest to the year of migrations to construct the regression models (Table S2, S3). The county-level presidential election returns data [1] did not have values for total votes in 2004 for counties in Oklahoma, so we used the sum of voters of GOP and DEM when calculating the voting rate for GOP.

## NAICS Data

Employment data by industry was retrieved from the U.S. Department of Labor’s Bureau of Labor Statistics. The data collection is called Quarterly Census of Employment and Wages, and the data used is from the North American Industry Classification System (NAICS), available online at: <https://www.bls.gov/cew/downloadable-data-files.htm>. The dataset used here is entitled "Single File CSVs on Annual Averages", and numbers represent number of employees in a particular sector. The data is aggregated to the sector level (aggregation level 76, representing 2-digit codes). The data include annual sums for years 2013 and 2016 and are spatially-aggregated to the county level.

Code descriptions (Table S1) are sourced from the U.S. Executive Office of the President, Office of Management and Budget (2017), retrieved from [https://www.census.gov/eos/www/naics/2017NAICS/2017\\_NAICS\\_Manual.pdf](https://www.census.gov/eos/www/naics/2017NAICS/2017_NAICS_Manual.pdf).

## Heatmaps for Migration Flows

We used heatmaps to show the density of migrant flows between county pairs with different GOP voting percentages. In the four presidential elections, most migrants flow between relatively neutral

Table S1: North American Industry Classification System (NAICS) Codes

| Two-Digit Code | Industry Description                                                     |
|----------------|--------------------------------------------------------------------------|
| 11             | Agriculture, Forestry, Fishing and Hunting                               |
| 21             | Mining, Quarrying, and Oil and Gas Extraction                            |
| 22             | Utilities                                                                |
| 23             | Construction                                                             |
| 31-33          | Manufacturing                                                            |
| 42             | Wholesale Trade                                                          |
| 44-45          | Retail Trade                                                             |
| 48-49          | Transportation and Warehousing                                           |
| 51             | Information                                                              |
| 52             | Finance and Insurance                                                    |
| 53             | Real Estate and Rental and Leasing                                       |
| 54             | Professional, Scientific, and Technical Services                         |
| 55             | Management of Companies and Enterprises                                  |
| 56             | Administrative and Support and Waste Management and Remediation Services |
| 61             | Educational Services                                                     |
| 62             | Health Care and Social Assistance                                        |
| 71             | Arts, Entertainment, and Recreation                                      |
| 72             | Accommodation and Food Services                                          |
| 81             | Other Services (except Public Administration)                            |
| 92             | Public Administration                                                    |

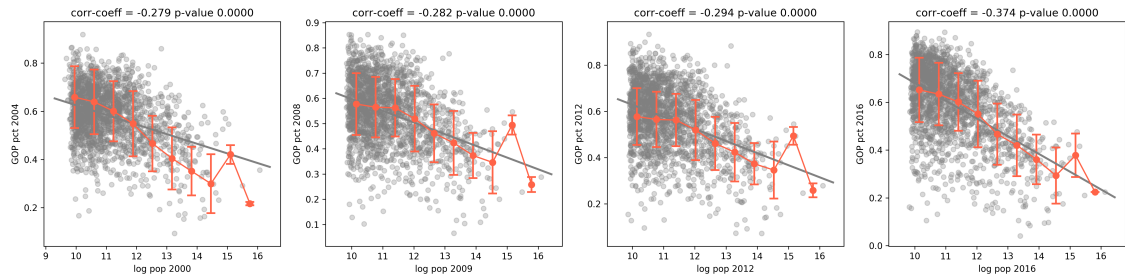

Figure S1: Low-population counties tend to vote for GOP candidates throughout the years.

Table S2: Data Summary

| Data Type           | Available Years        | Data Type                                    | Available Years        |
|---------------------|------------------------|----------------------------------------------|------------------------|
| IRS Migration Data  | 2002 - 2015            | Presidential Election Voting Data            | 2004, 2008, 2012, 2016 |
| Population          | 2000, 2009, 2012, 2016 | Median Household Income                      | 2000, 2009, 2012, 2016 |
| Median Age          | 2000, 2009, 2012, 2016 | Median Value of Owner-Occupied Housing Units | 2000, 2009, 2012, 2016 |
| Unemployment Rate   | 2000, 2009, 2012, 2016 | Percent of Population with Bachelor's Degree | 2000, 2009, 2012, 2016 |
| NAICS 2-Digit Codes | 2013, 2016             |                                              |                        |

counties (Figure S2 and Figure S3), as counties with relatively neutral voting patterns are common in the U.S. system.

In the main document, we presented a number of heatmaps of raw flows, and flows normalized by county origin population, county destination population. Each revealed consistent patterns of homophily throughout the years. In the main document these heatmaps are shown for four time periods, and here, we extend this to all seven time periods (Figure S4, Figure S5, and Figure S6), to illustrate more temporal detail.

Finally, we used the gravity model to estimate migrant flow ( $flow(i, j)$ ) and compare the difference between actual and estimated migration flows. The gravity model is mathematically estimated by:

$$flow(i, j) = k \frac{P_1^{\alpha_1} P_2^{\alpha_2}}{d_{ij}^{\beta}}$$

and we calibrated coefficients ( $k, \alpha_1, \alpha_2, \beta$ ) using actual migration flows. Here, county pairs with similar rates of partisan voting are more strongly connected (Figure S7).

## Regression with QAP

We used Quadratic Assignment Procedure (QAP) [3] for the hypothesis-testing stage. QAP is suitable for testing significance when independent variables are network adjacency matrices, as evidenced by prior political network related studies [2]. As introduced in the main paper, we calculated the dyadic effects resulting from political polarization based on GOP\_diff, GOP\_shared\_bias, and GOP\_prod. In both groups of models (group A and B), migration data throughout the years demonstrated strong tendencies to connect places with similar voting patterns (Figure S8 and Figure S9). Flows were higher between counties with similar partisan compositions, and this effect was particularly strong for counties with relatively extreme partisan compositions.

Table S3: Data combination for regression

| Model | Sequence | Migration Data | Census Data | NAICS Data | Voting Data |
|-------|----------|----------------|-------------|------------|-------------|
|       | 1        | 2002 & 2003    | 2000        | 2013       | 2004        |
|       | 2        | 2004 & 2005    | 2000        | 2013       | 2004        |
|       | 3        | 2006 & 2007    | 2009        | 2013       | 2008        |
|       | 4        | 2008 & 2009    | 2009        | 2013       | 2008        |
|       | 5        | 2010 & 2011    | 2012        | 2013       | 2012        |
|       | 6        | 2012 & 2013    | 2012        | 2013       | 2012        |
|       | 7        | 2014 & 2015    | 2016        | 2016       | 2016        |

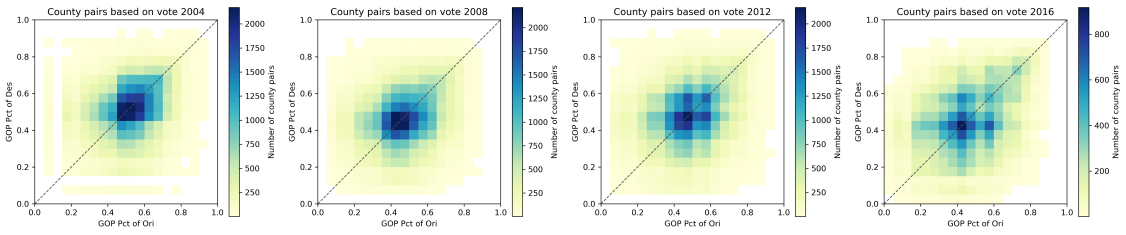

Figure S2: Density of number of county pairs based on specific GOP voting rates in different years.

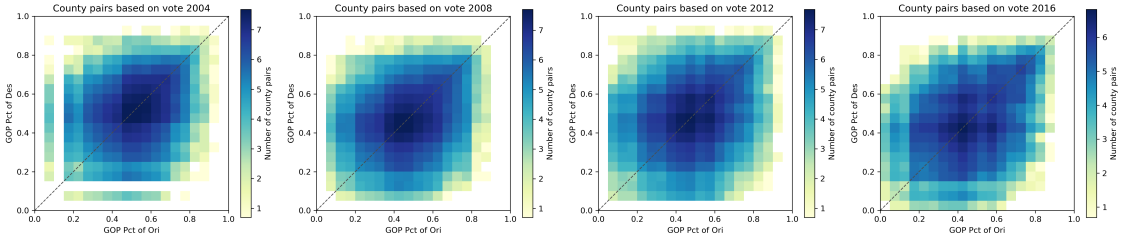

Figure S3: Density of number of county pairs based on specific GOP voting rates in different years using log scale.

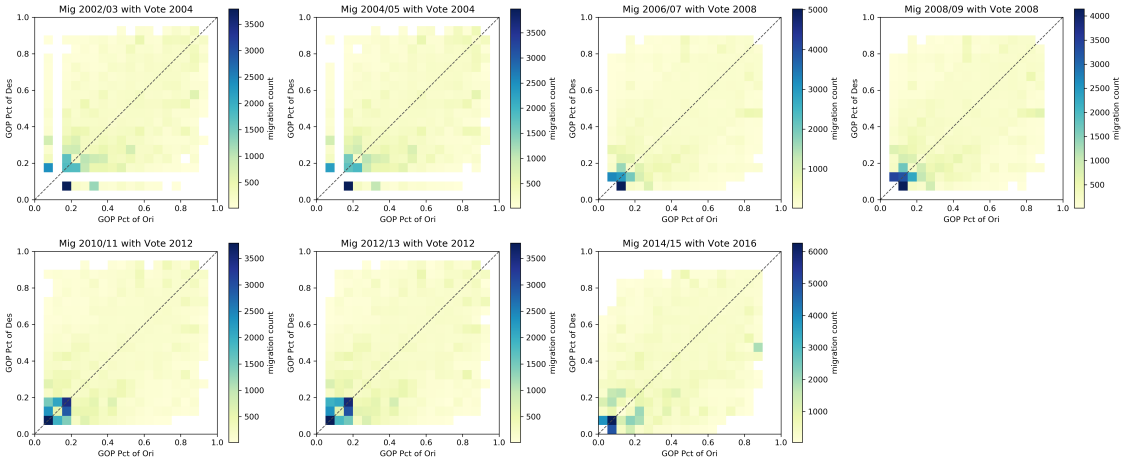

Figure S4: Density of raw migration flows between county pairs with specific GOP voting rates.

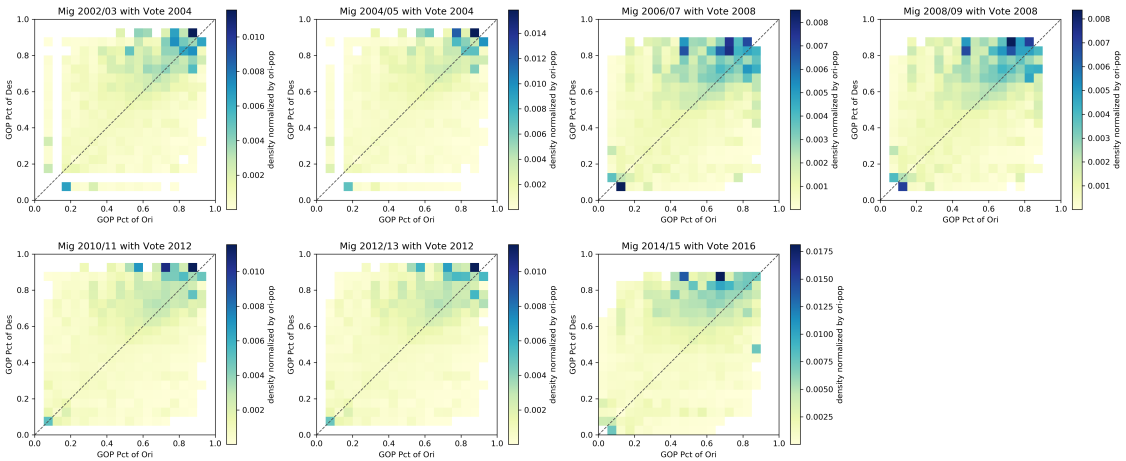

Figure S5: Density of migration flows normalized by origin county population.

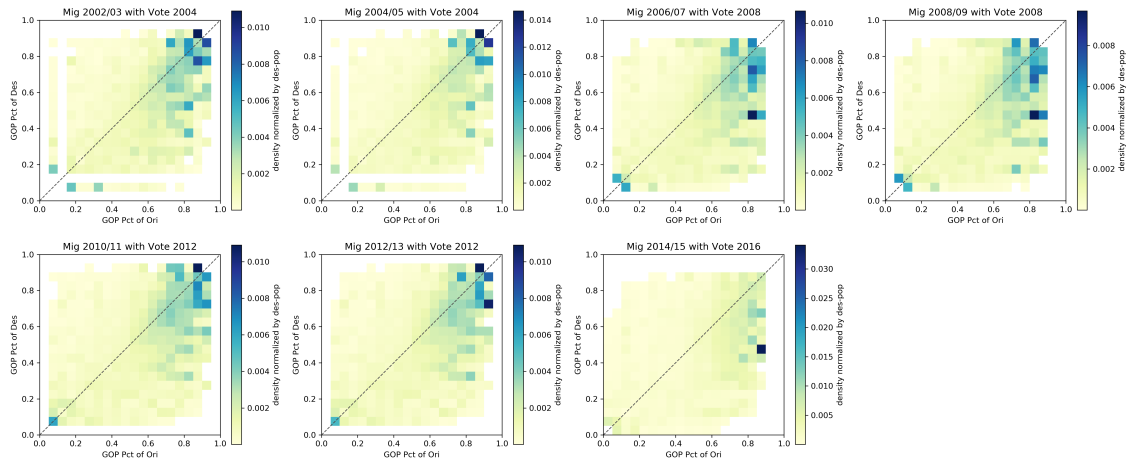

Figure S6: Density of migration flows normalized by destination county population.

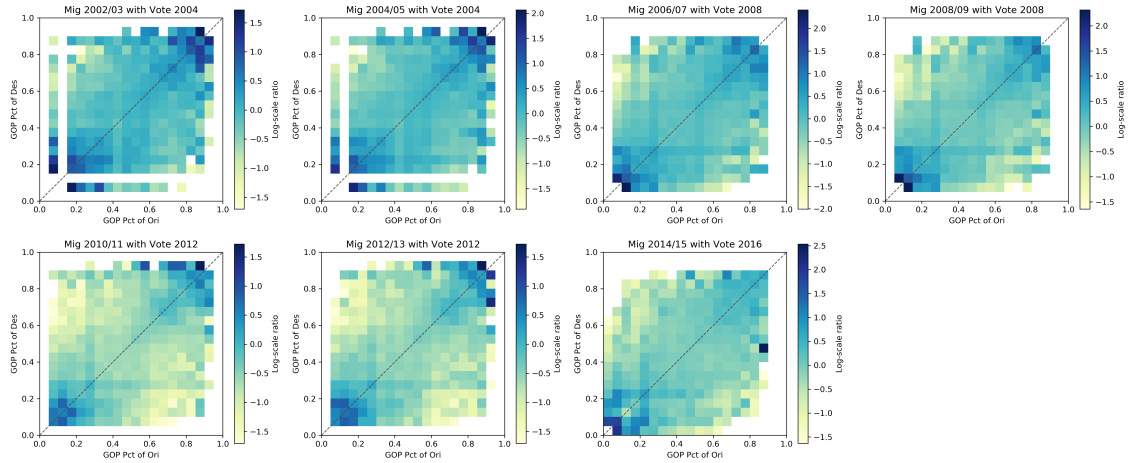

Figure S7: Log-scale ratios between the volume of actual migration flows and estimated migration flows normalized by gravity model estimates.

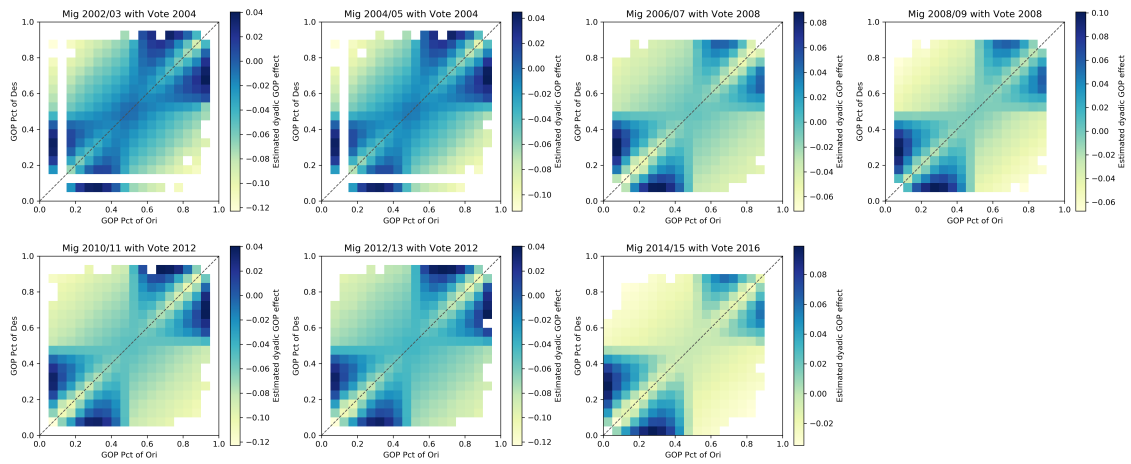

Figure S8: The integrated dyadic terms' effects based on `GOP_diff`, `GOP_shared_bias`, and `GOP_prod` between counties with certain GOP voting rates for model group A.

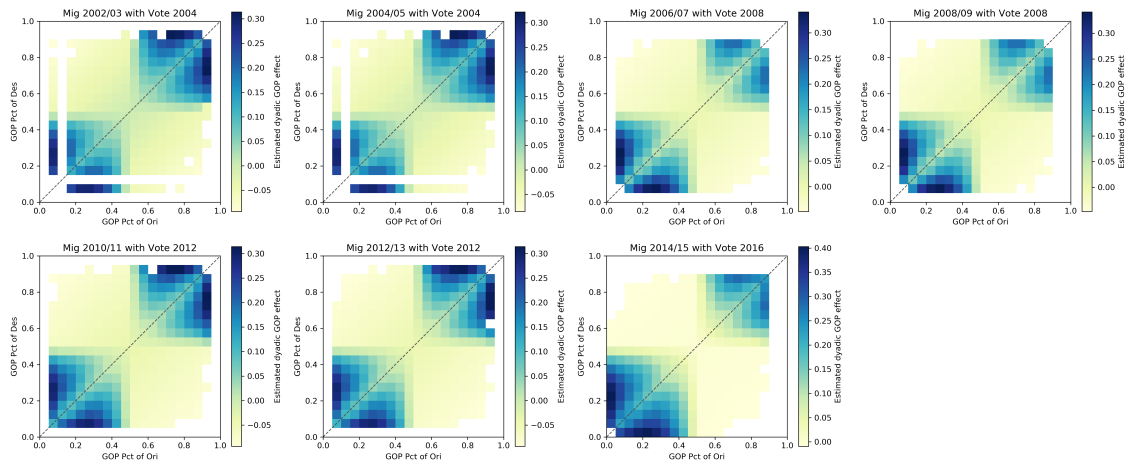

Figure S9: The integrated dyadic terms' effects based on `GOP_diff`, `GOP_shared_bias`, and `GOP_prod` between counties with certain GOP voting rates for model group B.

## References

- [1] MIT Election Data and Science Lab. County Presidential Election Returns 2000–2016, 2018.
- [2] Bruce A Desmarais and Skyler J Cranmer. Statistical inference in political networks research. In Jennifer Nicoll Victor, Alexander H. Montgomery, and Mark Lubell, editors, *The Oxford Handbook of Political Networks*, page 203. Oxford University Press, Oxford, UK, 2017.
- [3] David Krackardt. QAP partialling as a test of spuriousness. *Social Networks*, 9(2):171–186, 1987.
